# Supplementary material
Source: publisher site journal article supplement (https://www.spandidos-publications.com/7597/downloadSupplementary)
Supplement: Supplementary file 1 [file downloadSupplementary]

## Sheet: Sheet1
Table SIII. The infiltration proportions of 22 types of immune cells in the sample.
samples	group	B cells naive	B cells memory	Plasma cells	T cells CD8	T cells CD4 naive	T cells CD4 memory resting	T cells CD4 memory activated	T cells follicular helper	T cells regulatory (Tregs)	T cells gamma delta	NK cells resting	NK cells activated	Monocytes	Macrophages M0	Macrophages M1	Macrophages M2	Dendritic cells resting	Dendritic cells activated	Mast cells resting	Mast cells activated	Eosinophils	Neutrophils
GSM2544316	Normal	0.025446	0.0208035	0	0	0	0	0	0	0	0	0.169704	0.0447205	0.0351535	0.258079	0	0	0	0	0.431673	0	0.01442	0
GSM2544317	Normal	0.0663768	0.021052	0	0	0	0	0	0	0	0	0.14627	0.0483674	0.0182559	0.2631	0	0	0	0	0.436578	0	0	0
GSM2544318	Normal	0	0.0259338	0.0183624	0	0	0	0	0	0	0.131826	0.172913	0.0412863	0.00944133	0.214853	0.0036081	0	0	0	0.321323	0	0.060452	0
GSM2544319	Normal	0.094707	0.016787	0	0	0	0	0	0	0.000871779	0	0.107202	0.0448776	0.0275084	0.252078	0.00154444	0	0	0	0.454424	0	0	0
GSM2544320	Normal	0.00629162	0	0.081749	0.0274488	0.106662	0.0306258	0.0173716	0.061695	0	0	0.0811354	0	0.114759	0.26442	0.00570116	0	0	0	0.202139	0	0	0
GSM2544321	Normal	0.0818832	0.0882874	0	0	0	0	0.018939	0.0424342	0	0	0.0983953	0.0169815	0.00887532	0.231518	0.00682724	0	0	0	0.405859	0	0	0
GSM2544322	Normal	0.0728665	0.061902	0	0	0	0.0268574	0.0513921	0.0891899	0	0	0.107487	0.0147635	0.037474	0.176321	0.00763762	0	0	0	0.324639	0	0.0294705	0
GSM2544323	Normal	0.1616	0.0234688	0	0	0	0.0610565	0.0235734	0.11485	0	0	0.00902784	0.100228	0.0237595	0.150563	0.00431903	0	0	0	0.327554	0	0	0
GSM2544324	Normal	0.0795352	0.0957963	0	0	0	0	0.0491489	0.0809314	0	0	0.0206229	0.00559526	0.0145802	0.217238	0.0112135	0	0	0	0.404097	0	0.0212413	0
GSM2544325	Normal	0.163569	0.0297987	0	0	0	0.000502816	0.040971	0.111989	0	0	0.0101015	0.0212884	0.0142916	0.218801	0.0132082	0	0	0	0.375479	0	0	0
GSM2544326	Normal	0	0	0.0897836	0	0.0372809	0.0702341	0.00671304	0.0540493	0	0	0.167977	0.136705	0.048737	0.136785	0.000747674	0	0	0	0.214743	0	0.036245	0
GSM2544327	Normal	0.058102	0.0213198	0	0	0	0	0.0124788	0	7.09362e-05	0	0.10146	0.0307438	0	0.276806	0.00978816	0	0	0	0.401175	0	0.0880554	0
GSM2544328	Normal	0.142534	0.0633236	0	0	0	0	0	0.0992441	0	0.0104225	0.0172177	0.0423507	0.00989625	0.228547	0.0132044	0	0	0	0.371319	0	0.00194105	0
GSM2544329	Normal	0	0.0861502	0	0	0	0	0	0	0	0.199565	0.0345119	0.140764	0	0.15218	0.00383323	0	0	0	0.29245	0	0.0905456	0
GSM2544330	Normal	0.108347	0.00992757	0	0	0	0.038303	0.00820096	0.118309	0	0	0	0.121778	0.0286718	0.192254	0.00574185	0	0	0	0.366894	0	0	0.00157277
GSM2544331	Normal	0.0836222	0.00298695	0	0	0	0	0	0	0	0	0.157284	0.0566372	0.00427214	0.262776	0.00324993	0	0	0	0.429171	0	0	0
GSM2544332	Normal	0.015091	0.0983227	0	0.0121618	0	0	0.0380903	0.0694209	0	0	0.0781408	0.00351671	0.0242604	0.217664	0.00891104	0	0	0	0.38887	0	0.0455498	0
GSM2544333	Normal	0	0.0507498	0	0	0	0	0	0	0	0.229914	0	0.0906126	0	0.186379	0.00586608	0	0	0	0.36719	0	0.0684668	0.000821503
GSM2544334	Normal	0	0.129221	0	0.00785378	0	0.018571	0.0282727	0.00304271	0	0	0.08891	0.0922819	0.0139234	0.221185	0.0043765	0	0	0	0.392362	0	0	0
GSM2544335	Normal	0.0432531	0.0164046	0	0	0	0.0314154	0.0415431	0.0995607	0	0	0.175387	0.021757	0.0570779	0.159007	0	0	0	0	0.314693	0	0.0399011	0
GSM2544275	DN	0.0157037	0.016167	0	0	0.0843544	0.0101583	0	0.09046	0	0	0.0797787	0	0.0128216	0.288247	0.00620276	0.0177992	0	0	0.360004	0	0.0183036	0
GSM2544276	DN	0.0240109	0	0.0395069	0	0.0487233	0.0727553	0.0170291	0.0724696	0	0	0.0944847	0.049773	0	0.376963	0.0182186	0.0347094	0	0	0.135829	0	0.0155272	0
GSM2544277	DN	0.0747861	0.025324	0	0	0	0	0	0	0	0	0.1257	0.0444234	0.0221649	0.260505	0.00152011	0	0	0	0.445577	0	0	0
GSM2544278	DN	0.0711145	0.0194074	0	0	0	0	0.00464936	0	0.000253024	0	0.123336	0.0457021	0.00988682	0.271289	0.00562961	0	0	0	0.448732	0	0	0
GSM2544279	DN	0.0832491	0.0168842	0	0	0	0	0	0	0	0	0.122034	0.0428748	0.0254938	0.266946	0.000561354	0	0	0	0.441957	0	0	0
GSM2544280	DN	0.0643777	0.0219054	0	0	0	0	0	0	0	0	0.130776	0.0514684	0.021362	0.281104	0	0	0	0	0.429006	0	0	0
GSM2544281	DN	0.0571252	0.0331691	0	0	0	0	0.000368258	0	0	0	0.123351	0.0439111	0.00446037	0.270975	0.0124196	0	0	0	0.437746	0	0.0164742	0
GSM2544282	DN	0.123998	0.0127507	0	0	0	0.0279436	0.00823621	0.103699	0	0	0.0287378	0.106343	0.0344067	0.217677	0.0146652	0	0	0	0.321543	0	0	0
GSM2544283	DN	0.0771018	0.0228631	0	0	0	0	0	0	0	0	0.124437	0.0433074	0.0266835	0.266816	0.000593384	0	0	0	0.438198	0	0	0
GSM2544284	DN	0.071607	0.0268641	0	0	0	0	0.00587796	0	0.000167622	0	0.117073	0.038161	0.0105522	0.272659	0.00510553	0	0	0	0.447565	0	0.00436828	0
GSM2544285	DN	0.0794857	0.0243436	0	0	0	0	0	0	0	0	0.125324	0.0525495	0.0234206	0.253154	0.00436941	0	0	0	0.437354	0	0	0
GSM2544286	DN	0.11744	0.0931817	0	0	0	0	0	0.0591026	0	0.0923388	0	0.0290944	0	0.226715	0.0142429	0	0	0	0.354372	0	0.0135124	0
GSM2544287	DN	0.178103	0.0418596	0	0	0	0.0427274	0.0152398	0.119825	0	0	0.00229233	0.0522246	0.0199446	0.170779	0.0106494	0	0	0	0.346355	0	0	0
GSM2544288	DN	0.0310226	0.107305	0	0.0360686	0	0	0.0266687	0.0359157	0	0	0.0666167	0.0499804	0.0087417	0.222984	0.00901588	0	0	0	0.40568	0	0	0
GSM2544289	DN	0.198254	0.0406417	0	0	0	0	0.00575632	0.0712833	0.00994659	0.0492882	0	0.0371848	0	0.267334	0.0242639	0	0	0	0.296047	0	0	0
GSM2544290	DN	0.141232	0	0	0	0	0.0604957	0.0249101	0.126018	0	0	0.0132604	0.104469	0.0228053	0.180251	0.0148642	0	0	0	0.311694	0	0	0
GSM2544291	DN	0.0571357	0.0385045	0	0	0	0	0	0	0	0	0.142525	0.0445595	0.0239505	0.252822	0.00838695	0	0	0	0.432116	0	0	0
GSM2544292	DN	0.0628709	0.0254328	0	0	0	0	0.0090868	0	0.00147635	0	0.111663	0.0391368	0.00248923	0.273062	0.00573688	0	0	0	0.425926	0	0.0431193	0
GSM2544293	DN	0	0	0.0409018	0	0	0	0	0	0	0.0141455	0.0457621	0.00426154	0.0100745	0.213058	0.321148	0	0.284552	0	0.0660974	0	0	0
GSM2544294	DN	0.0955144	0.0126506	0	0	0	0	0	0	0	0	0.107024	0.04117	0.02987	0.272579	0.00251815	0	0	0	0.438675	0	0	0
GSM2544295	DN	0.033813	0	0	0	0	0	0	0	0	0	0.12046	0.0184302	0	0.277178	0.015055	0	0.0927022	0	0.318109	0	0.124251	0
GSM2544296	DN	0.0308573	0	0.0591512	0	0.0604103	0.0442996	0	0.0484265	0	0	0.057996	0.0165289	0	0.0892678	0.14108	0.0070069	0.30271	0	0.142266	0	0	0
GSM2544297	DN	0.0957497	0	0	0	0	0	0	0	0	0	0.132375	0.0601758	0.00713208	0.251548	0.00924601	0	0	0	0.443774	0	0	0
GSM2544298	DN	0.0177706	0	0.0299371	0.029569	0.112846	0.0608142	0.00783825	0.106624	0	0	0.101931	0	0.0269163	0.178089	0.0728671	0.00750212	0.00899882	0	0.238296	0	0	0
GSM2544299	DN	0	0	0.0882817	0	0.045637	0.00970904	0	0.00234833	0	0	0.0107186	0	0	0.0396911	0.248433	0.149064	0.375303	0	0	0.0308143	0	0
GSM2544300	DN	0.0776182	0	0.0188937	0	0.0314311	0.0970432	0.0342949	0.11236	0	0	0.0792973	0.0831667	0.025538	0.113007	0.0400073	0	0.0543685	0	0.232975	0	0	0
GSM2544301	DN	0.0445207	0	0.0391581	0	0.00575153	0.000953197	0	0	0	0	0.0851672	0.0133227	0.000791438	0.256234	0.0401112	0	0.291151	0	0.222839	0	0	0
GSM2544302	DN	0.0809791	0	0.0286754	0	0.0237907	0.0800783	0.0263631	0.109836	0	0	0.06317	0.0717665	0.0361172	0.194128	0.0123023	0	0.0394951	0	0.233297	0	0	0
GSM2544303	DN	0.145197	0	0	0	0	0.062794	0.0261634	0.130374	0	0	0.0105178	0.102704	0.0188453	0.170814	0.0172294	0	0	0	0.315361	0	0	0
GSM2544304	DN	0.0861829	0	0.0950733	0	0	0	0	0	0	0.020364	0.0322429	0.0106586	0.0105253	0.107802	0.0199413	0	0.4822	0	0.13501	0	0	0
GSM2544305	DN	0.106045	0	0.0434962	0	0.0670828	0.0548405	0.0108239	0.0196723	0.00103385	0	0.0110388	0	0.0196263	0.0783941	0.0425347	0	0.425635	0	0.119776	0	0	0
GSM2544306	DN	0.0684895	0	0.101152	0	0	0	0	0	0	0	0.0327936	0	0.095429	0.268207	0.0729693	0	0.263543	0	0.0974161	0	0	0
GSM2544307	DN	0.0624378	0	0.0216908	0	0.0354207	0.0829352	0.0338762	0.103862	0	0	0.0939326	0.0505655	0.0217376	0.175949	0.0377146	0	0.0616918	0	0.218186	0	0	0
GSM2544308	DN	0.0415337	0	0.0638591	0	0.0287728	0.00469891	0	0	0	0	0.0576059	0	0	0.197251	0	0.0867491	0.379228	0	0.140301	0	0	0
GSM2544309	DN	0.0518813	0	0.0452263	0.00833071	0.0384285	0.0343522	0	0.0491996	0	0	0	0	0	0	0.418581	0	0.349532	0	0.00446825	0	0	0
GSM2544310	DN	0.0159166	0	0.0628457	0	0.0928748	0.0853125	0.0191218	0.0772646	0	0	0.0478048	0.0416862	0	0.370408	0.0208643	0.0330526	0.00188872	0	0.111804	0	0.0191564	0
GSM2544311	DN	0.113847	0	0.051378	0	0.047221	0.0443286	0.0388582	0.0515737	0.0300665	0	0.0241866	0.0120473	0.0120104	0.176733	0.0352716	0	0.186329	0	0.17615	0	0	0
GSM2544312	DN	0.0053594	0	0.0609373	0.0253607	0.114144	0.0659717	0.00877515	0.0749664	0	0	0.0658602	0	0	0.306343	0.026078	0.0304357	0.0718764	0	0.143891	0	0	0
GSM2544313	DN	0.0720357	0.0345166	0	0	0	0	0	0	0.00837735	0	0.0840932	0.055791	0.0229372	0.263346	0.0028654	0	0	0	0.443908	0	0.0121301	0
GSM2544314	DN	0.0701758	0	0.0175554	0	0.00412082	0.00262546	0	0	0	0	0.0839083	0.0186192	0.039238	0.222132	0.00407644	0	0.274919	0	0.26263	0	0	0
GSM2544315	DN	0.068631	0.0151504	0	0	0	0	0	0	0	0	0.15248	0.0327001	0.014126	0.280257	0.000205354	0	0	0	0.43645	0	0	0
